# Supplementary material
Source: PubMed Central journal article supplement (PMC6251403)

**SUPPLEMENTARY MATERIAL**

**Table S1. Inheritance of the *Abcc6* mutation by heterozygous breeding in three mutant rat lines**

| Mutant line                                        | Gender |        | Genotype |      |       |
|----------------------------------------------------|--------|--------|----------|------|-------|
|                                                    | Male   | Female | Wt       | Het  | Hom   |
| <u><i>SD-Abcc6<sup>em2Qlju</sup></i> (Line 2):</u> |        |        |          |      |       |
| Observed                                           | 62     | 62     | 29       | 69   | 26    |
| Expected                                           | 62     | 62     | 31       | 62   | 31    |
| <i>P</i> value                                     | 1.000  |        | 0.4219   |      |       |
| <u><i>SD-Abcc6<sup>em3Qlju</sup></i> (Line 3):</u> |        |        |          |      |       |
| Observed                                           | 55     | 53     | 27       | 52   | 29    |
| Expected                                           | 54     | 54     | 27       | 54   | 27    |
| <i>P</i> value                                     | 0.8474 |        | 0.8948   |      |       |
| <u><i>SD-Abcc6<sup>em4Qlju</sup></i> (Line 4):</u> |        |        |          |      |       |
| Observed                                           | 74     | 67     | 34       | 70   | 37    |
| Expected                                           | 70.5   | 70.5   | 35.25    | 70.5 | 35.25 |
| <i>P</i> value                                     | 0.5555 |        | 0.9348   |      |       |

*Abcc6* heterozygous breeding pairs from three mutant rat lines were maintained on either normal laboratory diet or acceleration diet. Pups were weaned and genotyped at 4 weeks of age. Chi-squared test was used to analyze the comparison of observed and expected distribution; the differences are not statistically significant. Wt, wild type; Het, heterozygous; Hom, homozygous.

## FIGURE LEGEND

**Figure S1. Quantitative RT-PCR of rat *Abcc6* gene demonstrates expression primarily in the liver and at low levels in the kidney.** The amount of *Abcc6* mRNA per sample was normalized to *ACTB* mRNA and expressed relative to the level in the liver (1.0). **(a)** A cDNA panel from 8 rat tissues (liver, kidney, heart, whole brain, spleen, lung, skeletal muscle, and testis) was purchased from Clontech; **(b)** cDNA samples from aorta, skin and eyes were synthesized by the authors. The values are mean of three determinations.

**Figure S2. Illustration of targeted mutations in exon 1 of the rat *Abcc6* gene in four rat mutant lines.** The ZFN binding site is underlined, and the ZFN cut site is boxed. The mutant lines, SD-*Abcc6*<sup>em1Qlju</sup> (Line 1), SD-*Abcc6*<sup>em3Qlju</sup> (Line 3), SD-*Abcc6*<sup>em4Qlju</sup> (Line 4), and SD-*Abcc6*<sup>em5Qlju</sup> (Line 5), with confirmed germline transmission, carry deletion mutations of 10 bp, 10 bp, 20 bp, and 11 bp, respectively, as indicated in the figure. These deletion mutations are predicted to cause out-of-frame translation and premature stop codon.

**Figure S3. Energy dispersive X-ray analysis of the mineral deposits in the dermal sheath of vibrissae reveals hydroxyapatite deposition.** Elemental composition analysis in mineralized area reveals the presence of calcium and phosphorus as the principal ions in 1.57:1 atomic ratio **(a)**. The presence of carbon **(c)** reflects the carbon coating of the sample. X-ray topography of the distribution maps of calcium **(b, red)** and phosphorus **(c, green)** reveals co-localization, as demonstrated by merging the calcium and phosphorus maps **(d)**.

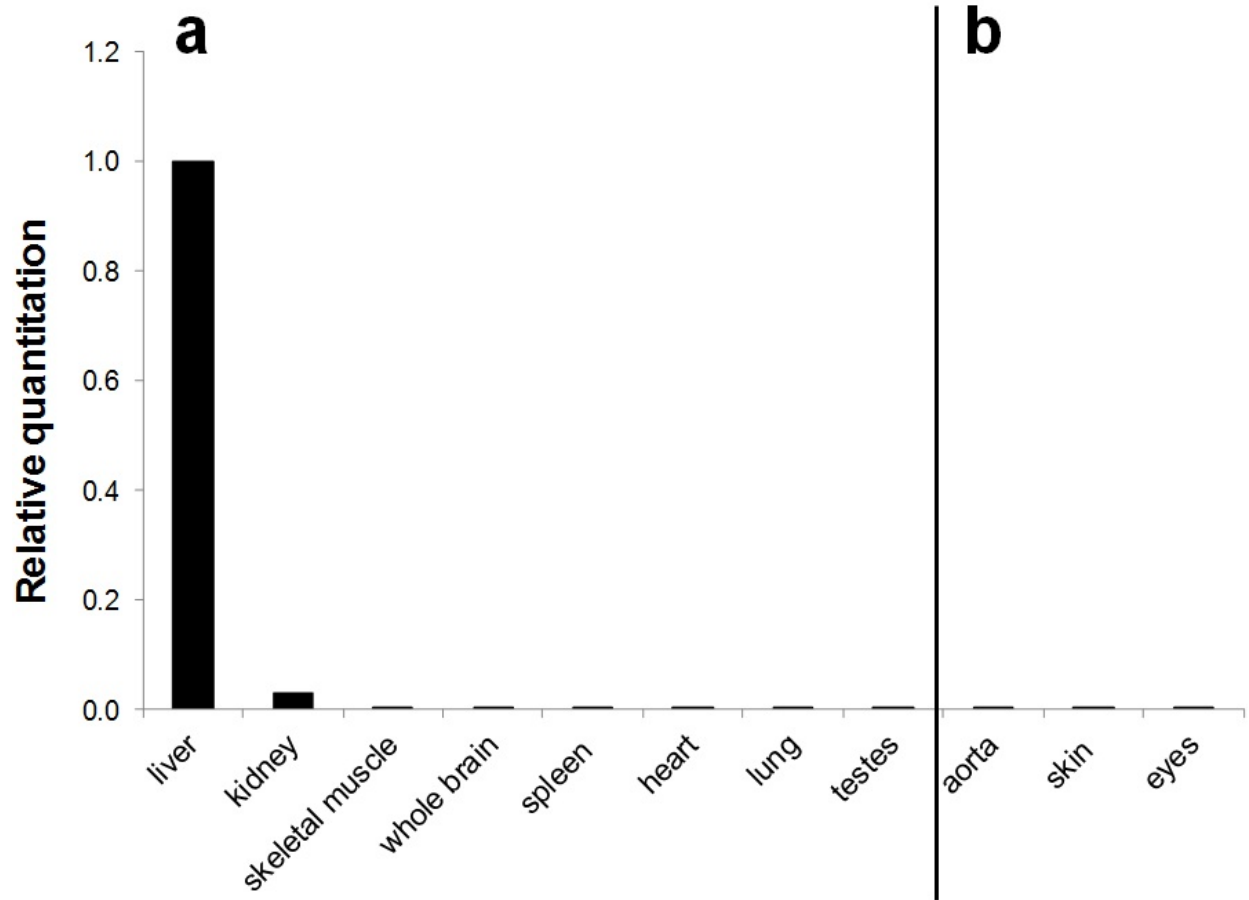

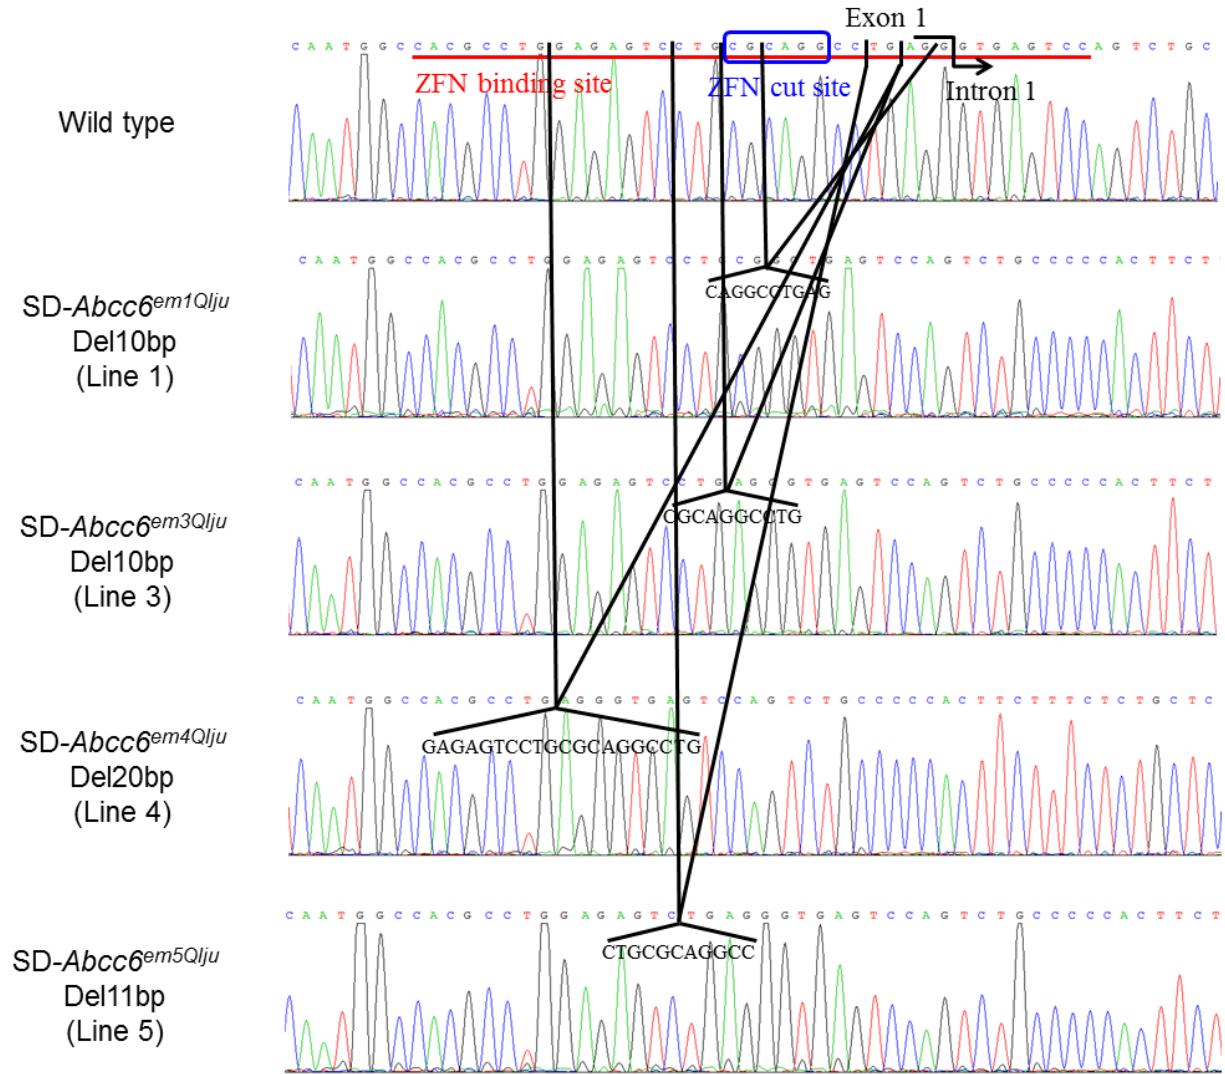

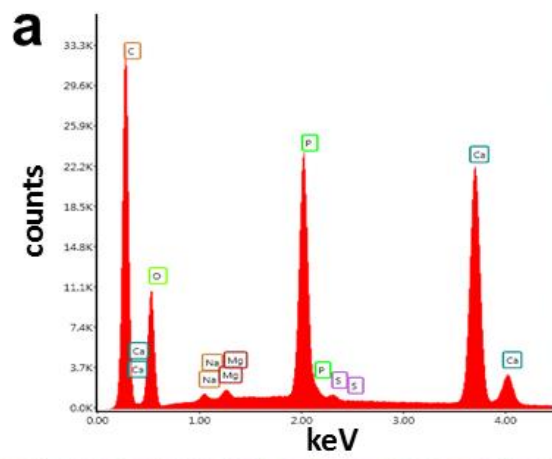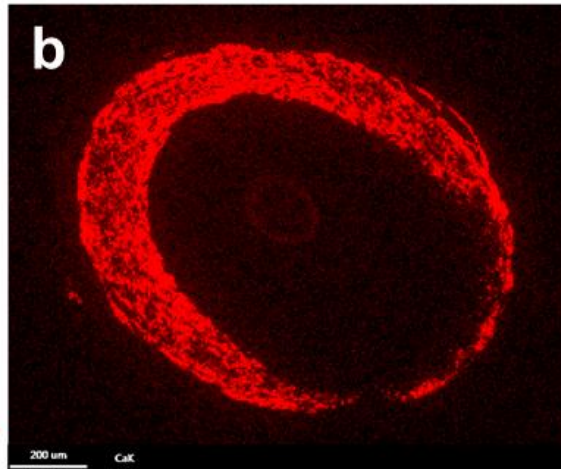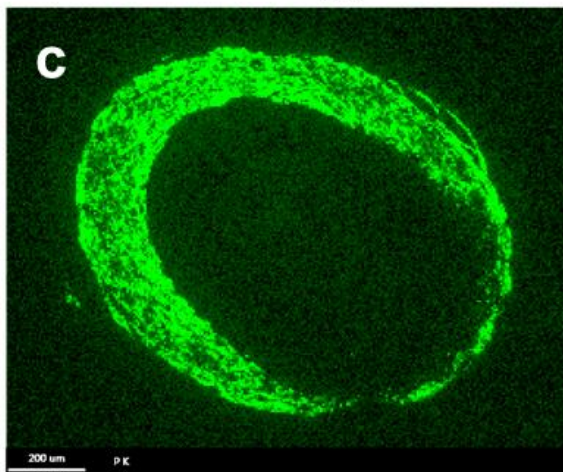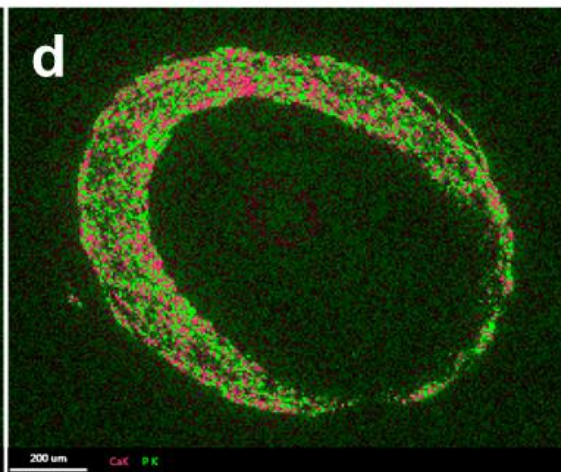

Supplement: NIHMS996327-supplement-1.pdf [file NIHMS996327-supplement-1.pdf]
